# Supplementary material for: Dysregulation of Alternative Poly-adenylation as a Potential Player in Autism Spectrum Disorder
Source: Front Mol Neurosci. 2017 Sep 13;10:279. doi: 10.3389/fnmol.2017.00279 (PMC5601403; doi:10.3389/fnmol.2017.00279)
Supplement: Supplementary file 3 [file Table_3.XLSX]

## Sheet: Sheet1
Supplementary Table 3 (Szkop et al.)
Regulatory elements (miRNA binding sites, UTR elements and RNA-binding protein target sites) found in the elongated parts of the 3' UTRs of genes with differential APA events in both the Ellis and Voineagu datasets
geneID	chr	strand	start	end	miRNA (TargetScan ver5.1)	UTR elements (UTR Scan - http://itbtools.ba.itb.cnr.it/utrscan)	RBP - RBPMap (http://rbpmap.technion.ac.il/)
ACTB	chr7	-	5566779	5567301	miR-145	CPE, SXL_BS	A1CF, CPEB2, CPEB4, HNRNPC, HNRNPCL1, HNRNPF, HNRNPK, HNRNPM, HNRNPU, HuR, KHDRBS1, KHDRBS2, KHDRBS3, MATR3, MBNL1, NOVA1, PABPN1,PCBP1,PCBP2, PTBP1, PUM2, RALY, RBM38, RBM41, TARDBP, SRSF1,SRSF2,SRSF3,SRSF5,SRSF7,SRSF9,TIA1, TRA2B, U2AF2,ZC3H14, ZCRB1, ZNF638
ARF5	chr7	+	127231621	127231759	miR-29abc		BRUNOL5,BRUNOL6,CPEB2,CPEB4,CUG-BP, G3BP2, HNRNPA1, HNRNPA1L2, HNRNPA2B1, HNRNPC, HNRNPCL1, HNRNPF, HNRNPH1,HNRNPH2, HNRNPM, HuR, KHDRBS3, LIN28A, MATR3, MBNL1, PTBP1, RALY, RBFOX1, RBM5, SFPQ, SNRPA, SRSF1, SRSF2, SRSF3, SRSF5, SRSF7, SRSF9, TARDBP, TIA1, TRA2A, U2AF2, ZC3H14, ZNF638
ARPC1A1	chr7	+	98963715	98963885	miR-9		A1CF,BRUNOL4,BRUNOL5,CPEB2,CPEB4,DAZAP1,HNRNPC,HNRNPCL1,HNRNPM,HuR,KHDRBS1,KHDRBS2,KHDRBS3,MATR3,MBNL1,PABPC1,PABPC5,PABPN1,PTBP1,PUM2,QKI,RALY,RBM46,SART3,SRSF3,SRSF5,TARDBP,TIA1,TRA2B,U2AF2,ZC3H14,ZCRB1,ZNF638
ATP6V0C	chr16	+	2569886	2570224	miR-340/340-5p	IRES	A1CF,BRUNOL4,BRUNOL5,CUG-BP,FUS,G3BP2,HNRNPF,HNRNPK,HNRNPM,MBNL1,PCBP1,PCBP3,PTBP1,PUM2,RBM24,RBM38,RBM4,RBM8A,RBMS1,RBMS3,SRSF2,SRSF3,SRSF5,TARDBP,TRA2B,ZC3H14,ZNF638
B4GALT2	chr16	+	44456333	44456843	miR-19, miR-34a/34b-5p/34c/34c-5p/449/449abc/699, miR-148/152		*
BRSK1	chr19	+	55823567	55823903	miR-339-5p	IRES	A1CF,CPEB2,CUG-BP,ESRP2,HNRNPA1,HNRNPA1L2,HNRNPA2B1,HNRNPC,HNRNPCL1,HNRNPF,HNRNPH2,HNRNPK,HNRNPM,HuR,MBNL1,PCBP2,PTBP1,RALY,RBM4,SRSF1,SRSF2,SRSF3,SRSF5,TARDBP,ZC3H14,ZCRB1
CALM1	chr14	+	90871903	90874619	miR-19, miR-218,miR-1/206, miR-340/340-5p:1, miR-340/340-5p:2,miR-133, miR-488, miR-143	SXL_BS	A1CF,ANKHD1,BRUNOL4,BRUNOL5,BRUNOL6,CNOT4,CPEB2,CPEB4,CUG-BP,DAZAP1,ESRP2,FMR1,FXR2,HNRNPA1,HNRNPA2B1,HNRNPC,HNRNPCL1,HNRNPF,HNRNPH2,HNRNPK,HNRNPL,HNRNPM,HNRNPU,HNRPLL,HuR,IGF2BP2,KHDRBS1,KHDRBS2,KHDRBS3,MATR3,MBNL1,MSI1,NOVA1,PABPC1,PABPC3,PABPC4,PCBP2,PCBP3,PTBP1,PUM2,QKI,RALY,RBM24,RBM28,RBM38,RBM41,RBM42,RBM5,RBM6,RBMS1,RBMS3,SART3,SFPQ,SNRNP70,SNRPA,SRSF1,SRSF2,SRSF3,SRSF5,SRSF7,TARDBP,TIA1,…
CALM3	chr19	+	47112625	47114039	miR-29abc, miR-25/32/92/92ab/363/367, miR-137, miR-320/320abcd, miR-27ab, miR-196ab	K-BOX, GY-BOX	BRUNOL4,BRUNOL5,BRUNOL6,CNOT4,CPEB2,CPEB4,CUG-BP,ESRP2,FMR1,FUS,FXR2,HNRNPA1,HNRNPA1L2,HNRNPA2B1,HNRNPC,HNRNPCL1,HNRNPF,HNRNPH1,HNRNPH2,HNRNPL,HNRNPM,HNRNPU,HNRPLL,HuR,IGF2BP3,KHDRBS1,KHDRBS2,KHDRBS3,MATR3,MBNL1,NOVA1,PABPC1,PABPC4,PABPC5,PABPN1,PCBP1,PCBP2,PCBP3,PTBP1,PUM2,QKI,RALY,RBFOX1,RBM5,RBM6,RBMS1,RBMS3,SART3,SNRNP70,SRSF1,SRSF2,SRSF3,SRSF5,SRSF7,SRSF9,TARDBP,TIA1,TRA2B,U2AF2,YBX2,ZC3H10,…
CAMK2B	chr7	-	44256749	44258619		UNR-bs	BRUNOL4,BRUNOL5,BRUNOL6,CNOT4,CPEB2,CPEB4,CUG-BP,DAZAP1,ENOX1,ESRP2,G3BP2,HNRNPA1,HNRNPA1L2,HNRNPA2B1,HNRNPC,HNRNPCL1,HNRNPF,HNRNPH2,HNRNPK,HNRNPL,HNRNPM,HNRNPU,HuR,IGF2BP2,IGF2BP3,KHDRBS1,KHDRBS2,KHDRBS3,MBNL1,MSI1,NOVA1,PABPC1,PABPC3,PABPC4,PABPC5,PABPN1,PCBP1,PCBP2,PCBP3,PTBP1,QKI,RALY,RBFOX1,SAMD4A,SART3,SFPQ,SNRNP70,SRSF1,SRSF2,SRSF3,SRSF5,SRSF7,SRSF9,TARDBP,TIA1,TRA2B,U2AF2,YBX1,YBX2,ZC3H14…
CTSF	chr11	-	66330935	66331185	miR-137	IRES	CUG-BP,G3BP2,HNRNPA1,HNRNPA1L2,HNRNPA2B1,HNRNPC,HNRNPCL1,HNRNPF,HNRNPM,HuR,KHDRBS1,MATR3,MBNL1,PCBP3,PTBP1,QKI,RALY,RBMS3,SRSF1,SRSF2,SRSF3,SRSF5,TARDBP,TRA2B,YBX1,YBX2,ZC3H14
DYNLL1	chr12	+	120936077	120936298			BRUNOL4,BRUNOL5,BRUNOL6,CUG-BP,HNRNPA1,HNRNPC,HNRNPCL1,HNRNPU,HuR,KHDRBS1,KHDRBS2,KHDRBS3,MATR3,MBNL1,NOVA1,PABPC1,PABPC4,PABPC5,PABPN1,PTBP1,PUM2,RALY,RBM38,RBM41,SART3,SFPQ,SRSF2,SRSF3,SRSF5,TARDBP,TRA2B,U2AF2,ZC3H14
DYNLRB1	chr20	+	33128647	33128762			CPEB2,CPEB4,CUG-BP,HNRNPC,HNRNPCL1,HuR,MBNL1,PABPC4,PABPC5,PTBP1,QKI,RALY,RBM42,SRSF1,SRSF2,SRSF3,SRSF5,TIA1,TRA2B,U2AF2,ZC3H14
EVL	chr14	+	100610253	100610573			A1CF,BRUNOL4,BRUNOL5,CPEB2,CPEB4,CUG-BP,HNRNPC,HNRNPCL1,HNRNPL,HNRPLL,HuR,MBNL1,NOVA1,PCBP3,PTBP1,PUM2,RALY,RBM38,RBM41,RBMS3,SNRPA,SRSF2,SRSF3,SRSF5,TARDBP,TIA1,TRA2B,U2AF2,ZC3H14
FAIM2	chr12	-	50260679	50264204	miR-17-5p/20/93.mr/106/519.d, miR-544:2, miR-544:1, miR-193ab, miR-326/330/330-5p	ADH_DRE	ANKHD1,BRUNOL4,BRUNOL5,BRUNOL6,CNOT4,CPEB2,CPEB4,CUG-BP,ESRP2,FMR1,FXR1,FXR2,G3BP2,HNRNPA1,HNRNPA1L2,HNRNPA2B1,HNRNPC,HNRNPCL1,HNRNPF,HNRNPH1,HNRNPH2,HNRNPK,HNRNPU,KHDRBS1,KHDRBS2,KHDRBS3,LIN28A,MATR3,MBNL1,NOVA1,PABPC1,PABPC4,PABPN1,PCBP1,PCBP2,PCBP3,PTBP1,PUM2,RALY,RBFOX1,RBM24,RBM38,RBM46,RBM5,RBM6,RBMS3,SAMD4A,SART3,SNRNP70,SNRPA,SRSF1,SRSF10,SRSF2,SRSF3,SRSF5,SRSF7,SRSF9,TARDBP,TIA1,TRA2A,TR…
GNB2	chr7	+	100276603	100276792	miR-374/374ab	IRES	A1CF,CPEB2,CPEB4,CUG-BP,ESRP2,G3BP2,HNRNPC,HNRNPCL1,HNRNPH1,HNRNPH2,HNRNPK,HuR,LIN28A,MBNL1,PABPC3,PCBP3,PTBP1,RALY,RBMS3,SAMD4A,SRSF1,SRSF2,SRSF3,SRSF5,SRSF7,SRSF9,TARDBP,TIA1,TRA2A,TRA2B,U2AF2,ZC3H14
GPX1	chr3	-	49394609	49394786		SECIS1, SECIS2	CUG-BP,HNRNPF,HNRNPH2,HNRNPM,MBNL1,PABPC3,PTBP1,RBM38,SRSF1,SRSF2,SRSF3,SRSF5,SRSF9,TARDBP,TRA2B,YBX1,YBX2
HIGD2A	chr5	+	175816633	175816751			CUG-BP,HuR,KHDRBS1,KHDRBS2,KHDRBS3,MBNL1,RALY,RBM41,SRSF2,SRSF3,SRSF5,TARDBP,TRA2B,ZC3H14,ZNF638
HLA-A	chr6	+	29913521	29913661		IRES	KHDRBS1,KHDRBS2,KHDRBS3,PABPC3,PTBP1,SRSF3,SRSF7,TRA2B
ISCU	chr12	+	108963004	108963160		IRES	CNOT4,CUG-BP,IGF2BP2,KHDRBS1,KHDRBS2,KHDRBS3,MBNL1,PABPC1,PABPC4,PABPC5,PTBP1,PUM2,RBM41,RBMS1,RBMS3,SART3,SNRPA,SRSF1,SRSF2,SRSF3,SRSF5,TRA2B
KLHDC3	chr6	+	42988859	42989036	miR-340/340-5p		A1CF,CUG-BP,ESRP2,HNRNPA1,HNRNPA1L2,HNRNPH2,KHDRBS1,KHDRBS2,KHDRBS3,MBNL1,PABPC1,PABPC4,PABPC5,PCBP1,PCBP2,PTBP1,RBM46,SART3,SRSF2,SRSF3,SRSF5,TRA2B,ZCRB1
NGFRAP1	chrX	+	102632762	102633001		IRES, K-BOX	BRUNOL4,BRUNOL5,BRUNOL6,CPEB2,CPEB4,CUG-BP,ESRP2,FMR1,FXR1,FXR2,G3BP2,HNRNPA1,HNRNPC,HNRNPCL1,HNRNPF,HNRNPH1,HNRNPH2,HNRNPU,HuR,IGF2BP2,IGF2BP3,KHDRBS1,KHDRBS2,KHDRBS3,LIN28A,MATR3,MBNL1,NOVA1,PABPC1,PABPC3,PABPC4,PABPC5,PABPN1,PCBP1,PCBP3,PTBP1,PUM2,RALY,RBM38,RBM45,RBM46,RBM5,SART3,SRSF1,SRSF10,SRSF2,SRSF3,SRSF5,SRSF7,SRSF9,TARDBP,TIA1,TRA2A,TRA2B,U2AF2,YBX1,YBX2,ZC3H14,ZCRB1
NRGN	chr11	+	124616506	124617102	miR-23ab	IRES, UNR-bs, GY-BOX	BRUNOL4,BRUNOL5,BRUNOL6,CUG-BP,FUS,HNRNPA1,HNRNPA2B1,HNRNPF,HNRNPH1,HNRNPH2,HNRNPK,HNRNPL,HNRNPU,HNRPLL,IGF2BP3,KHDRBS2,MATR3,MBNL1,NOVA1,PABPC1,PABPC3,PABPC4,PABPC5,PABPN1,PCBP1,PCBP2,PCBP3,PPRC1,PTBP1,RALY,RBM24,RBM38,RBM4,RBM8A,SART3,SRSF1,SRSF2,SRSF3,SRSF5,SRSF7,TARDBP,TRA2B,ZC3H10,ZC3H14,ZNF638
PEBP1	chr12	+	118582721	118583390		K-BOX	A1CF,BRUNOL6,CPEB2,CUG-BP,ESRP2,HNRNPA1,HNRNPA2B1,HNRNPF,HNRNPM,HNRNPU,HuR,KHDRBS1,KHDRBS2,KHDRBS3,MATR3,MBNL1,MSI1,PABPC1,PABPC3,PABPC4,PABPC5,PCBP3,PTBP1,PUM2,QKI,RALY,RBM46,RBMS3,SART3,SRSF2,SRSF3,TARDBP,TRA2B,U2AF2
PPP2R1A	chr19	+	52729549	52729678			BRUNOL4,BRUNOL5,BRUNOL6,CNOT4,CPEB2,CPEB4,HNRNPA1,HNRNPA2B1,HNRNPC,HNRNPCL1,HNRNPM,HuR,KHDRBS1,KHDRBS2,KHDRBS3,MBNL1,MSI1,NOVA1,PABPC1,PCBP2,PCBP3,RALY,RBM24,RBM38,SART3,SRSF10,SRSF2,SRSF3,SRSF5,TARDBP,TIA1,TRA2B,U2AF2,ZC3H14
PRR13	chr12	+	53840069	53840427			A1CF,CPEB2,CPEB4,CUG-BP,DAZAP1,ESRP2,HNRNPA1,HNRNPA1L2,HNRNPC,HNRNPCL1,HNRNPF,HNRNPM,HuR,MATR3,MBNL1,PABPC1,PABPC3,PCBP1,PTBP1,PUM2,RALY,RBM41,RBM42,SART3,SNRPA,SRSF1,SRSF2,SRSF3,SRSF5,SRSF7,TARDBP,TIA1,TRA2A,TRA2B,U2AF2,ZC3H14,ZNF638
RHOA	chr3	-	49396579	49397270			A1CF,BRUNOL4,BRUNOL5,BRUNOL6,CPEB2,CPEB4,CUG-BP,DAZAP1,HNRNPA1,HNRNPC,HNRNPCL1,HNRNPF,HNRNPU,HuR,KHDRBS1,KHDRBS2,KHDRBS3,MBNL1,MSI1,NOVA1,PABPC3,PABPC4,PABPC5,PABPN1,PCBP3,PTBP1,PUM2,QKI,RALY,RBM41,RBM42,RBMS1,RBMS3,SRSF2,SRSF3,SRSF5,TARDBP,TIA1,TRA2B,U2AF2,YBX1,ZC3H14,ZCRB1,ZNF63
SCG5	chr15	+	32988952	32989298			BRUNOL4,BRUNOL5,CPEB2,CPEB4,CUG-BP,DAZAP1,HNRNPC,HNRNPCL1,HNRNPF,HNRNPH1,HNRNPL,HNRNPU,HuR,KHDRBS1,KHDRBS2,KHDRBS3,MBNL1,MSI1,PABPC1,PABPC4,PABPC5,PTBP1,PUM2,RALY,RBFOX1,RBM42,RBM46,RBM6,RBMS1,SART3,SRSF1,SRSF2,SRSF3,SRSF5,SRSF7,SRSF9,TARDBP,TIA1,TRA2A,TRA2B,TUT1,U2AF2,ZC3H14,ZCRB1
U2AF1	chr21	-	44513066	44513149			CPEB2,CPEB4,HNRNPA1,HNRNPC,HNRNPCL1,HNRNPL,HNRNPU,HNRPLL,HuR,IGF2BP2,IGF2BP3,KHDRBS1,KHDRBS2,KHDRBS3,PABPC1,PABPC3,PABPC4,PABPC5,RALY,SART3,SRSF3,TIA1,TRA2B,U2AF2,YBX1,YBX2,ZC3H14
UCHL1	chr4	+	41270322	41270446		IRES	A1CF,BRUNOL4,BRUNOL5,CUG-BP,HNRNPC,HNRNPCL1,HNRNPU,HuR,KHDRBS1,KHDRBS2,KHDRBS3,MBNL1,PABPN1,PTBP1,SRSF2,SRSF3,SRSF5,TARDBP,TRA2B,ZC3H14,ZCRB1
						Legend:	*Reference genome with unspecified nucleotides
						CPE - Cytoplasmic polyadenylation element
						SXL_BS - SXL binding site
						IRES - internal ribosome entry site
						UNR-bs - UNR binding site
						ADH_DRE - Alcohol dehydrogenase 3'UTR downregulation control element
						SECIS1 - Selenocysteine Insertion Sequence - type 1
						SECIS2 - Selenocysteine Insertion Sequence - type 2
